# Interplay between metrical and semantic processing in French: an N400 study.

Noémie te Rietmolen<sup>1</sup>, Radouane El Yagoubi<sup>2</sup>, and Corine Astésano<sup>1</sup>

<sup>1</sup>Octogone-Lordat, University Jean-Jaurès — Toulouse

<sup>2</sup>CLLE-LTC, University Jean-Jaurès — Toulouse

## Abstract

French accentuation is held to belong to the level of the phrase. Consequently French is considered ‘a language without accent’ with speakers that are ‘deaf to stress’. Recent ERP-studies investigating the French initial accent (IA) however demonstrate listeners to not only discriminate between different stress patterns, but also expect words to be marked with IA early in the process of speech comprehension. Still, as words were presented in isolation, it remains unclear whether the preference applied to the lexical or to the phrasal level. In the current ERP-study, we address this ambiguity and manipulate IA on words embedded in a sentence. Furthermore, we orthogonally manipulate semantic congruity to investigate the interplay between accentuation and later speech processing stages. Results reveal an early fronto-centrally located negative deflection when words are presented without IA, indicating a general dispreference for words presented without IA. Additionally, we found an effect of semantic congruity in the centro-parietal region (the traditional region for N400), which was bigger for words without IA than for words with IA. Furthermore, we observed an interaction between metrical structure and semantic congruity such that  $\pm$ IA continued to modulate N400 amplitude fronto-centrally, but only in the sentences that were semantically incongruent. The results indicate that presenting word without initial accent hinders semantic conflict resolution. This interpretation is supported by the behavioral data which show that participants were slower and made more errors words had been presented without IA. As participants attended to the semantic content of the sentences, the finding underlines the automaticity of stress processing and indicates that IA may be encoded at a lexical level where it facilitates semantic processing.

## 26 1 Introduction

27 Prosody has an important role in speech comprehension; where in written form, language is structured by  
28 white spaces and punctuation marks, spoken language is organized through intonation, accentuation, and  
29 rhythm. Especially metrical structures have long been considered crucial in the segmentation of speech. With  
30 no clear separation between words in the speech signal, the metrical segmentation strategy (MSS) proposes  
31 that listeners rely on their languages' metrical pattern to identify word boundaries (Cutler & Norris, 1988;  
32 Cutler, 1990). Indeed, in stress-based languages, such as English or Dutch, wherein stress is part of the lexical  
33 entry, accents provide reliable cues to lexical boundaries. And also in French, a language often described to be  
34 syllable-based due to the fairly homogeneous metrical weight on syllables, prosodic structure has been found  
35 to guide speech segmentation (Welby, 2007; Spinelli et al., 2010; Banel & Bacri, 1994; Bagou et al., 2002;  
36 Christophe et al., 2004, among others). However, in these studies, segmentation was not considered lexical but  
37 presumed phrasal, i.e. listeners are assumed to adopt a *prosodic segmentation strategy* in which intonational and  
38 accentual patterns function to segment *prosodic groups* (i.e. level of the accentual phrase, AP; Jun & Fougeron,  
39 2000) from the speech signal (Wauquier-Gravelines, 1999). This view stems from traditional descriptions of  
40 French as 'a boundary language' (Vaissière, 1991) or 'a language without accent' (Rossi, 1980) according to  
41 which stress, because it is not lexically distinctive in French and because its surface realization is acoustically  
42 merged with intonational boundaries, has no clear metrical value.

43 Two group-level accents are generally recognized in French, the primary final accent (FA) and the sec-  
44 ondary initial accent (IA). FA is the compulsory stress and falls on the last syllable of the last word of AP where  
45 it marks the right prosodic constituent boundary. Because FA relies on largely the same acoustic-phonetic  
46 parameter as intonation in French, local prominences near phrase boundaries will blend with the intonation  
47 contour so that their phonetic parameters are spread and diluted over adjacent syllables (e.g. Rossi, 1980;  
48 Fónagy, 1980). Moreover, when a word is embedded into a phrase, primary accents within the phrase may  
49 be phonetically reduced, or de-accented (e.g. Di Cristo, 1999; Astésano, 2016), to favor a more prominent  
50 marking of the phrase boundary (hence the label *boundary language* for French, Vaissière, 1991). For instance,  
51 in 'jolie fille' the primary accent on the phrase internal word ('jolie') may be reduced such that the group  
52 boundary is more pronounced ('jolie fille') (Delattre, 1966; Rossi, 1980). It is important to realize, however,  
53 that 'de-accentuation' does not mean that the accent is deleted and disappears completely. Instead, the accent  
54 is reduced to various degrees depending on rhythmic, contextual and pragmatic circumstances. This means  
55 both that 1) a trace of the local prominence survives and that 2) de-accentuation does not exclusively serve  
56 a clear marking of phrasal boundaries. In the above example, for instance, the de-accentuation also helped  
57 dodge a stress clash when the primary French accent (FA) located on the last syllable of 'jolie' was followed  
58 by the monosyllabic 'fille' (also carrying primary stress). Indeed, the occurrence of two consecutive stressed  
59 syllables is universally disfavored and may be avoided by restructuring the surface realization of the underlying  
60 prosodic representations (Liberman & Prince, 1977; Nespor & Vogel, 1983).

61 For instance, in French, de-accenting FA to evade stress clashes may lead to the first syllable of the phrase  
62 being accented instead, the initial accent (IA, 'jolie fille'). This is one of the reasons for which the initial accent  
63 is interpreted as the optional and secondary accent in French. The initial accent is, however, not exclusively  
64 a result of the stress clash resolution; IA also serves a rhythmic balancing function to break long stretches  
65 of unaccented syllables, again contributing to its status as a secondary accent. Further, the accent is often  
66 confused with the emphatic accent. That is, the initial stress may also be expressive, pragmatically contrasting  
67 sentence meaning with an accentual emphasis. Finally, as in the example above, the initial accent may mark the  
68 left boundary of AP and help group the words into a cohesive union (Di Cristo, 1999; Astésano, 2016). That  
69 is, the union of IA and FA, called *an accentual arch* (Fónagy, 1980), presents a bipolar stress template which  
70 underlies AP and groups the words it contains (see also Rolland & Løevenbruck, 2002). Thus, IA is associated  
71 with a number of different functions, but these functions remain post-lexical in nature so that the phonological

72 status of IA and its functions in lexical processing are still unclear.

73 In the current ERP-study, we investigate the functional role of IA in word level processing. We align to  
74 Di Cristo's metrical model of French which proposes both FA and IA to be phonologically encoded in (latent)  
75 cognitive stress templates underlying the representations of words (Di Cristo, 2000). According to the model,  
76 words are then marked with metrically strong syllables at both left and right lexical boundaries that can readily  
77 notify listeners on when to initiate lexical access. The model therefore provides a valuable theoretical context  
78 to speech segmentation in French. Indeed, studies showing IA to play an important role in the marking of  
79 lexical structure and speech segmentation are accumulating. For instance, a series of perception studies has  
80 found IA to be a more reliable cue to word boundaries than FA and to be perceived as more prominent at  
81 both phrasal and lexical levels (Astésano et al., 2007, 2012; Garnier et al., 2016; Garnier, 2018). Further, the  
82 initial accent is perceived even when its acoustic parameters are reduced (Jankowski et al., 1999), or when its  
83 pitch rise peaks further along in the word (e.g. Astésano et al., 2012), indicating a strong metrical expectation  
84 for the accent. These results prompted a recent paper to revisit the secondary and optional nature of IA and  
85 suggest IA carries a metrical strength that is at least equal to that of FA, both accents working together in the  
86 marking of the lexical word (Astésano & Bertrand, 2016).

87 Recent neuroimaging studies corroborate this idea and underline the role of IA in French word processing.  
88 When presenting words with or without IA in an oddball study, Aguilera and colleagues obtained a larger  
89 MisMatch Negativity components (MMN) when the oddball had been presented without IA than when the  
90 oddball was presented with IA (Aguilera et al., 2014). Such an asymmetry between MMNs indicates that IA  
91 is encoded in long-term memory and part of the expected stress template. Following up on these results, IA  
92 was manipulated in a lexical decision task wherein trisyllabic nouns and pseudowords were presented with or  
93 without IA (te Rietmolen et al., 2016). Omitting IA resulted in a processing cost during stress extraction as  
94 reflected by a more ample N325 (Böcker et al., 1999) regardless of lexical condition, which demonstrates both  
95 the automaticity of stress extraction and an expectation for words to be marked with IA in the pre-lexical stage  
96 of speech processing (see also Böcker et al., 1999, for a similar interpretation of the N325 in an investigation  
97 of stress processing in Dutch, a language with obligatory and distinctive stress).

98 However, the two ERP studies above also presented some ambiguities. Firstly, the results of the lexical  
99 decision study (te Rietmolen et al., 2016) suggested that their metrical manipulations elicited an N400, as  
100 there appeared to be a negativity in the latency range typically associated with the N400. This would indicate  
101 a role for IA in lexico-semantic processing, and so a function in word level analysis. The authors were however  
102 cautious to interpret this negativity as an N400, because words were presented in isolation (i.e. without se-  
103 mantic context), while the N400 is more typically elicited in paradigms such as the semantic priming paradigm  
104 (wherein a target-word directly follows a word or image to which it is semantically related or not), or the  
105 semantic anomaly paradigm (wherein sentences are presented with a target-word that is semantically congru-  
106 ent or incongruent within the sentence context). Secondly, presenting words in isolation had, as additional  
107 consequence, that IA was always in utterance initial position. Indeed, both in Aguilera et al. (2014) and in  
108 te Rietmolen et al. (2016) words had been presented as independent utterances, so that listeners may have  
109 processed them as individual accentual phrases. Hence, it can not be ruled out that the templates — and the  
110 processing cost when IA was omitted— applied to the phrase level instead of the level of the lexical word.

111 In the current N400-study we sought to elucidate these ambiguities and manipulated IA on words posi-  
112 tioned within a sentence. Additionally, we manipulated the semantic congruity of the sentences, allowing us  
113 to investigate whether IA also affects the lexico-semantic processing stages in speech comprehension.

114 The N400 is a centro-parietally located negativity that peaks around 400 ms after the detection of a se-  
115 mantic discrepancy. The negativity is considered an adept indicator of obstructed speech comprehension, with  
116 amplitude modulations or delayed latencies revealing difficulties in speech processing. Still, the precise nature  
117 of the N400 remains a topic of considerable debate. That is, it is unclear, whether N400 modulations are

118 restricted to semantic information or whether the N400 can additionally be modulated by mismatching phono-  
119 logical information, such as metrical patterns. One commonly held belief on the nature of the N400, is that it  
120 results from hindered contextual integration (van den Brink et al., 2001; Brown & Hagoort, 1993). In this view,  
121 the N400 indicates difficulties in the post-lexical stage of speech comprehension, i.e. the stage after initial  
122 pre-lexical activation and lexical access have been completed, and is unlikely to be influenced by phonological  
123 processes. Another stance, however, considers the N400 to reflect the degree of lexical pre-activation. In this  
124 view, higher levels of pre-activation (as a results of, for instance, supporting prior semantic information or word  
125 frequency) facilitate lexical access and reduce N400 amplitude (Kutas & Hillyard, 1980; Kutas & Federmeier,  
126 2011). This stance then takes the N400 to reflect predictive, anticipatory processes that need not exclusively  
127 be of semantic nature, but can be phonological as well (DeLong et al., 2005; Lau et al., 2008).<sup>1</sup>

128 Indeed, a number of studies have shown misguided phonological expectations in healthy subjects (e.g.  
129 Praamstra & Stegeman, 1993; Dumay et al., 2001, 2002; DeLong et al., 2005) or impaired phonological  
130 analysis in patients (Robson et al., 2017) to interfere with subsequent semantic evaluation and modulate the  
131 N400. Furthermore, metrical information has also been found to interplay with lexico-semantic processing  
132 (e.g. Magne et al., 2007; Rothermich et al., 2010; Marie et al., 2011; Rothermich et al., 2012; Bohn et al.,  
133 2013). For instance, in a series of studies, Rothermich and colleagues manipulated the metrical regularity  
134 in German jabberwocky (Rothermich et al., 2010) and semantically anomalous sentences (Rothermich et al.,  
135 2012; Rothermich & Kotz, 2013) by presenting words either with a metrically regular or irregular beat and  
136 showed metrical regularity to facilitate semantic ambiguity resolution, as indicated by a modulated and earlier  
137 N400, which, unlike its usual centro-parietal distribution, appeared to be more frontally located. The authors  
138 relate their findings to theories of predictive coding and suggest metrically predictable stress to provide a  
139 metrical framework to which brain oscillations can align in an effort to optimize speech comprehension (*cf.*  
140 Pitt & Samuel, 1990). That is, by presenting speech with a regular (i.e. predictable) underlying beat, listeners  
141 were able to a priori direct their attention from one stressed syllable to the next (in their words) “island  
142 of reliability”, which in turn facilitated semantic processing. Note that Böcker et al. (1999) had a likewise  
143 interpretation of the N325 (which indeed displayed a similar latency and spatial distribution as the negativity  
144 reported in Rothermich et al. 2010, 2012) as they considered the N325 to reflect the interface of automated  
145 acoustic processing and controlled, top-down metrical processing in the analysis of speech. They argued that  
146 the N325 potentially indexes difficulties in processes that are involved in pre-lexical speech segmentation  
147 and the initiation of lexical access on the basis of rhythm and metrical stress. In that view, the N325 directly  
148 measures the role of metrical stress in speech processing as proposed in MSS (Cutler & Norris, 1988, see also  
149 the Attentional Bounce Hypothesis, Pitt & Samuel 1990). In fact, more recent work has, in a similar vein,  
150 asserted the earlier and more frontal N400 to index online speech segmentation, although in that work the  
151 frontal negativity was linked to novel word-form to conceptual knowledge mapping in parallel (e.g. Cunillera  
152 et al., 2009; Dittinger et al., 2017; François et al., 2017). So while the frontal N400 (or N325) is not yet fully  
153 understood, and has led to slightly different views as to what it precisely represents, there seems to be some  
154 common ground with phonological/metrical expectancy influencing semantic processing. That is, metrical  
155 structure helps listeners to a priori guide their attention towards stressed syllables (i.e. perceptually stable and  
156 prominent syllables located near word onsets), which cue listeners on when to segment speech and initiate  
157 their search in the mental lexicon, in turn facilitating access to meaning.

158 In French, a previous ERP study investigating the relationship between metrical structure and late speech  
159 processing, also found metrical violations to obstruct semantic processing (Astésano et al., 2004; Magne et al.,  
160 2007). In the study, participants listened to sentences in which semantic and/or metrical congruity was manip-

---

<sup>1</sup> Note that while the post-lexical integration theory *may* reject anticipatory processes and consider the N400 to index exclusively post-lexical processes initiated upon perceiving the target word, it not necessarily *needs* to; one can easily imagine integration processes to also benefit from successful (semantic) anticipation based on prior contextual information (as is pointed out by Yan et al. 2017, see also Kuperberg & Jaeger 2016 and Nieuwland et al. 2018).

161 ulated. Semantic congruity was manipulated by presenting sentences in which the last word was incoherent  
162 with the semantic context of the sentence, while metrical congruity was manipulated by lengthening the medial  
163 syllable of the last word, an illegal stress pattern in French. Furthermore, listeners completed two different  
164 tasks, one in which they attended semantic congruity, and one in which they judged metrical congruity. This  
165 allowed Magne and colleagues to determine whether metrical and/or semantic processing proceeds automati-  
166 cally or depends on the direction of attention. Behavioral results showed listeners to make more errors when  
167 either meter or semantics was incongruent. Furthermore, listeners made the most errors when meter was in-  
168 congruent, but semantics was congruent, indicating that metric incongruities disrupt semantic processing. This  
169 interpretation was corroborated by their results from the ERP data. Not only did Magne and colleagues obtain  
170 a larger N400 to metrically incongruous words than to metrically congruous words in the metric task, but,  
171 interestingly, the metrical violation resulted in an increased N400, also in the semantic task (i.e. independent  
172 from attention), and even when the sentences were semantically congruent (see also Astésano et al., 2004).  
173 These results indicate that accentual patterns, also in French, affect the later stages of speech comprehension,  
174 during which access to meaning and semantic integration takes place.

175 However, in the study of Magne et al. (2007), the processing cost resulted from presenting an illegal stress  
176 pattern, with metrical weight on the medial syllable, and it remains unclear whether semantic processing also  
177 suffers when words are presented with metrical structures that, while legal, deviate from the expected stress  
178 pattern. Or, put more concretely, if IA is linked to the phonological representation of words and is, along with  
179 FA, the expected stress template in French, we anticipate that presenting words without IA impacts access to  
180 meaning and modulates the (frontal) N400.

181

## 182 2 Methods

### 183 2.1 Participants

184 20 French native speakers, aged 19 – 47 (mean age 24.2), gave their written consent and volunteered to take  
185 part in the study. The study was conducted in accordance with the Declaration of Helsinki. Subjects had  
186 foreign language skills at high-school level or less, they were right-handed, with normal hearing abilities and  
187 no reported history of neurological or language-related problems. Due to excessive artifacts in the EEG signal,  
188 two participants are excluded from the EEG analyses.

### 189 2.2 Speech stimuli

190 This corpus consisted of French carrier sentences that were spoken by a native male speaker of standard French  
191 and recorded in an anechoic chamber using a digital audiotape (sampling at 44.1 kHz) (see also Magne et al.,  
192 2007). The sentences were spoken in a declarative mode, with the pitch contour always falling at the end of  
193 the sentence. Furthermore, each sentence ended with a trisyllabic target noun that either made sense in the  
194 semantic context of the sentence (semantically congruent, +s) or was nonsensical with its preceding context  
195 (semantically incongruent, -s) (see figure 1 for an example of the item +s and -s, with target words  
196 +IA and -IA). Semantically incongruous sentences were built by replacing the final congruent word with  
197 a word that shared similar acoustic and phonological characteristics, but did not make sense in the sentence  
198 context. Moreover, semantically congruent and incongruent target words all had CV syllable structures and  
199 were matched for word frequency (92.38 and 91.36 occurrences per million, respectively), using the LEXIQUE2  
200 French lexical database (New et al., 2001, in Magne et al. 2007). So, congruent and incongruent target words  
201 were acoustically and phonologically similar and had been matched in word frequency and word and syllable  
202 duration (a more detailed account on the construction of the sentences can be found in Magne et al. 2007).

203 Stimuli selection was based on the presence of a marked and natural IA in the original corpus in both  
 204 semantic conditions. Because the primary phonetic parameter of IA is a rise in  $f_0$  (Astésano, 2001), this meant  
 205 that only sentences in which the target nouns in both semantic conditions started with a rise of  $f_0$  of at least  
 206 10% on the first syllable compared to the preceding  $f_0$  value on the (unaccented) determinant (Ladd, 2008;  
 207 Astésano et al., 2007) were admitted in the current corpus. 160 stimuli met this criteria; 80 carrier sentences  
 208 with 80 +s target nouns and 80 -s target nouns.

209 The metrical condition ( $\pm$ IA) was created by lowering the  $f_0$  value on the first vowel of the target-words  
 210 near the  $f_0$  value on the preceding (unaccented) determinant in order to remove the natural +IA and create  
 211 the -IA condition (see figure 1). This manipulation was achieved using a customized quadratic algorithm (see  
 212 Aguilera et al., 2014, for more details) in PRAAT (Boersma & Weenink, 2016) which progressively modified  
 213 the  $f_0$  values while allowing for micro-prosodic variations to be maintained such that the natural sound of the  
 214 stimuli remained intact. Further, the +IA stimuli were forward and back transformed to equalize the speech  
 215 quality between +IA and -IA stimuli.

216 The resulting 320 stimuli over the four experimental conditions (+S +IA, -S +IA, +S -IA, and -S  
 217 -IA) were divided over four lists, such that each participant was presented with 80 unique sentences, i.e. 20  
 218 sentences per condition.

**Table 1:** Overview of mean stimulus properties within the semantically congruent and incongruent conditions  $\pm$ IA (total sentence and target-word duration, first syllable and syllable-vowel durations, and first syllable-vowel  $f_0$  values).

|                          | Sentence <i>ms</i> |           | Target word <i>ms</i> |           | 1st syllable <i>ms</i> |           | 1st vowel <i>ms</i> |           | 1st vowel $f_0$ |           |
|--------------------------|--------------------|-----------|-----------------------|-----------|------------------------|-----------|---------------------|-----------|-----------------|-----------|
|                          | <i>m</i>           | <i>sd</i> | <i>m</i>              | <i>sd</i> | <i>m</i>               | <i>sd</i> | <i>m</i>            | <i>sd</i> | <i>m</i>        | <i>sd</i> |
| SEMANTICALLY CONGRUENT   |                    |           |                       |           |                        |           |                     |           |                 |           |
| -IA                      | 2097.07            | 402.81    | 552.88                | 96.98     | 157.23                 | 28.76     | 72.16               | 25.9      | 116.56          | 11.73     |
| +IA                      | 2092.07            | 402.81    | 552.88                | 96.98     | 157.23                 | 28.76     | 72.16               | 25.9      | 126.38          | 12.2      |
| SEMANTICALLY INCONGRUENT |                    |           |                       |           |                        |           |                     |           |                 |           |
| -IA                      | 2122.59            | 411.72    | 583.45                | 61.72     | 160.57                 | 32.16     | 77.86               | 27.23     | 123.02          | 42.18     |
| +IA                      | 2122.59            | 411.72    | 583.45                | 61.72     | 160.57                 | 32.16     | 77.86               | 27.23     | 140.28          | 44.26     |

### 219 2.3 Procedure

220 Each participant was comfortably seated in an electrically shielded and sound attenuated room. Stimuli were  
 221 presented through headphones using Python2.7 with the PyAudio library on a Windows XP 32-bit platform.  
 222 Participants were instructed to judge as quickly and accurately as possible whether a sentence was semantically  
 223 congruent or incongruent by pressing the left or right arrow key on a standard keyboard using their dominant,  
 224 right hand. Arrow key assignment was counter-balanced across participants. The ISI was fixed at 600 ms.  
 225 Participants were allowed to give their answer from the start of the target word until 1500 ms post stimulus  
 226 offset. To ensure participants understood the task requirements, the experiment began with a short practice  
 227 phase, consisting of 10 trials that were similar to the experimental trials, but not included in the analyses.

228 Each participant listened to a complete list of all 80 stimuli. Using Latin square designs, the four conditions  
 229 (+S +IA, -S +IA, +S -IA, and -S -IA) were evenly distributed over two blocks, with block order  
 230 balanced across participants. Total duration of the experiment, including the set-up of the EEG electrodes, was  
 231 approximately 1.5h.

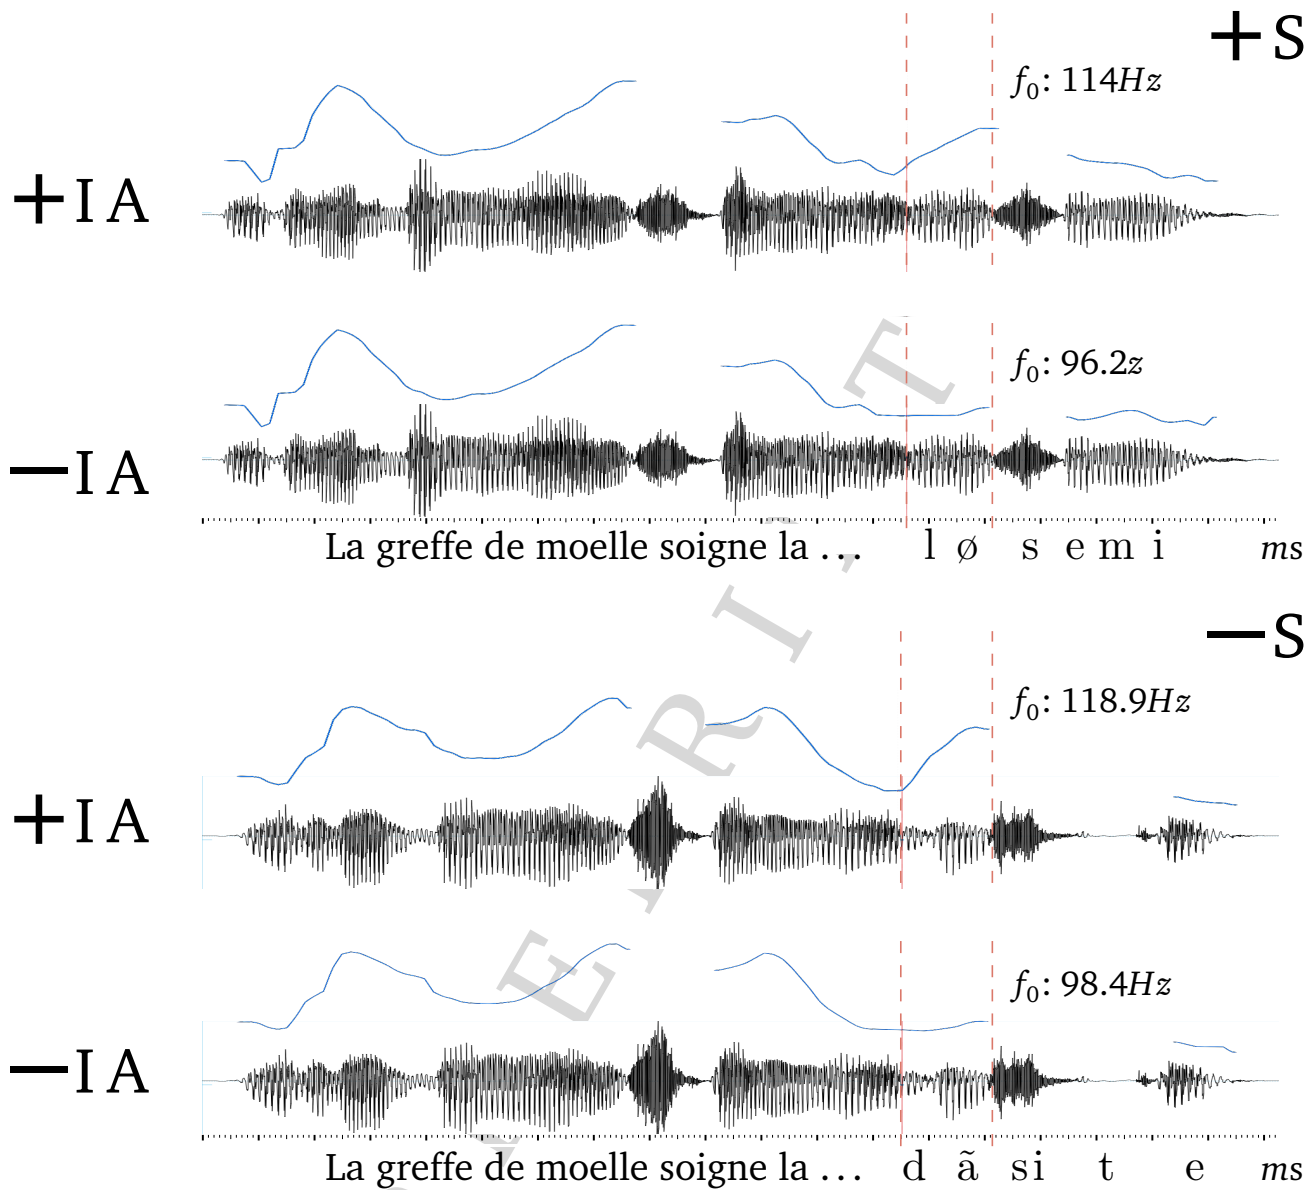

**Figure 1:** Example of  $f_0$  resynthesis with (+IA) and without initial accent (-IA) on semantically incongruent (+S, top two) and semantically congruent (-S, bottom two) sentences with quadratic interpolation from the  $f_0$  value of the preceding determinant to the  $f_0$  value at the beginning of the last stressed syllable for +IA targets (visible in blue). The time window of  $\pm$ IA is indicated by vertical red dashed lines.

## 232 2.4 EEG recording and preprocessing

233 EEG data were recorded with 64 Ag/AgCl-sintered electrodes mounted on an elastic cap and located at standard  
 234 left and right hemisphere positions over frontal, central, parietal, occipital and temporal areas (International  
 235 10/20 System; Jasper, 1958). The EEG signal was amplified by BioSemi amplifiers (ActiveTwo System) and  
 236 digitized at 2048 Hz. The data were preprocessed using the EEGlab package (Delorme & Makeig, 2004) with  
 237 the ERPlab toolbox (Luck et al., 2010) in Matlab (Mathworks, 2014). Each electrode was re-referenced offline  
 238 to the algebraic average of the left and right mastoids. The data were band-pass filtered between 0.01 – 30 Hz  
 239 and resampled at 256 Hz.

240 Following a visual inspection, signal containing EMG or other artifacts not related to eye-movements or  
241 blinks was manually removed. ICA was performed on the remaining data in order to identify and subtract  
242 components containing oculomotor artifacts. Finally, data were epoched from  $-0.2$  to  $1$  seconds surrounding  
243 the onset of the target word and averaged within and across participants to obtain the grand-averages for each  
244 of the four conditions ( $+S +IA$ ,  $+S -IA$ ,  $-S +IA$ ,  $-S -IA$ ).

## 245 2.5 Analysis—behavioral and EEG

### 246 2.5.1 Behavioral

247 The behavioral data (i.e. accuracy rates and response latencies) were analyzed in R (Team, 2014) with the  
248 lme4 package (Bates et al., 2012). Visual inspection of residual plots did not reveal any obvious deviations  
249 from homoskedasticity or normality.

250 For the accuracy rates, binary logistic regression was used to analyze the two predictors semantic congruency  
251 and presence of IA. That is, the model tested how well semantic congruency and presence of IA predicted the  
252 proportion of errors. For response latency (a continuous variable), a linear mixed effects model was used to  
253 analyze the effect semantic congruency and IA had on reaction times. For both accuracy rates and response  
254 latencies, the models additionally included participants and stimuli as random variables. More specifically, for  
255 the random structure, intercepts for listeners and stimuli, as well as by-stimuli random slopes for the effects  
256 of metrical pattern and semantic congruency best accounted for underlying random variability.  $p$ -values were  
257 obtained by likelihood ratio tests of the model with the effect in question against the model without the effect  
258 in question.

### 259 2.5.2 EEG

260 The EEG data was analyzed with a mass univariate permutation test, which allows for correction of multiple  
261 comparisons and rigorous control of the family-wise error rate, while remaining statistically powerful (Groppe  
262 et al., 2011; Luck, 2014; Fields, 2017). The analysis was implemented using the Mass Univariate ERP Toolbox  
263 (Groppe et al., 2011) and Factorial Mass Univariate ERP Toolbox (Fields, 2017) in Matlab (Mathworks, 2014)  
264 and statistical significance was assessed with the  $F_{\max}$  statistic (Blair & Karniski, 1993). The null distribution  
265 was estimated by repeatedly sampling the data types from the ERP data, and selecting the largest  $F$ -value for  
266 each comparison (i.e. the  $F_{\max}$ ). In all analyses, we set the number of permutations per comparison to 10,000  
267 to approximate the null distribution for the customary family-wise alpha ( $\alpha$ ) level of 0.05. To further maximize  
268 statistical power and reduce the number of comparisons, data were down-sampled to 128 Hz.

269 Because, while the N400 resulting from semantic incongruities is typically maximal in the centro-parietal  
270 region of the brain (Brown & Hagoort, 1993; Kutas & Federmeier, 2011), violations in metrical/phonological  
271 expectancies more commonly result in a N400 that is more frontally located (e.g. Böcker et al., 1999; DeLong  
272 et al., 2005; Lau et al., 2008; Steinhauer & Connolly, 2008; Rothermich et al., 2010, 2012; Yan et al., 2017),  
273 we selected fronto-central and centro-parietal electrodes (Fpz, FCz, Fz, AFz, Fp1, Fp2, FC1, FC2, F1, F2, AF3,  
274 AF4, Cz, P1, P2, C3, C4, Pz, P3, P4, CP1, CP2). Furthermore, because the phonological/metrical N400 has  
275 been reported to precede the semantic N400 temporally (e.g. Magne et al., 2007; Steinhauer & Connolly,  
276 2008; Rothermich et al., 2010, 2012) we tested two separate time-windows; 351 – 451 ms for the metrical  
277 N400 and 450 – 650 ms for the semantic N400.

278 Finally, to make sure that modulations in our N400 time-windows would not reflect P2 residue due to  
279 differential acoustic processing on our  $\pm IA$  stimuli, we also tested this time-window from 181 – 281 ms.



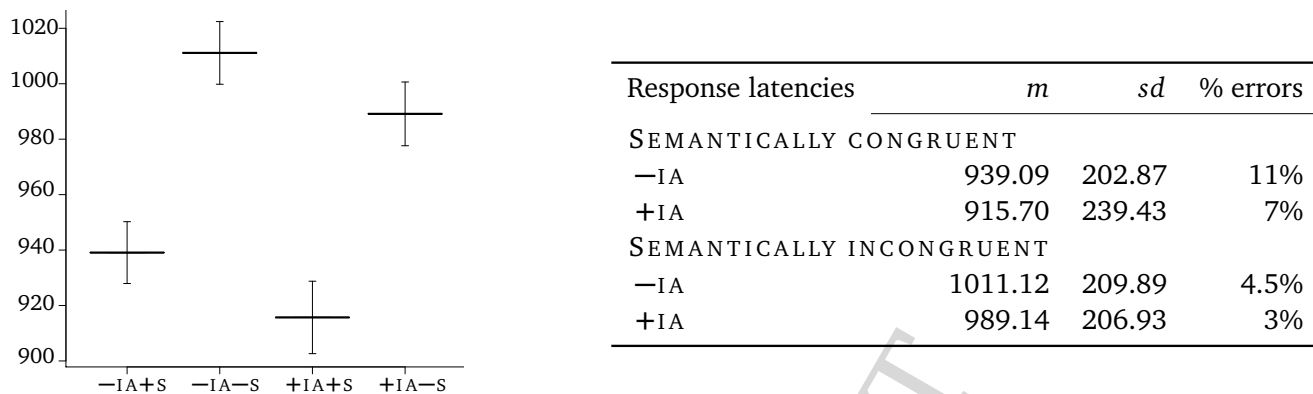

**Figure 2:** Left: Error-bar plot of mean reaction times for all four conditions (-IA +S, -IA -S, +IA +S, +IA -S) revealing a significant effect of both  $\pm IA$  and of  $\pm S$ , with no interaction between the two experimental manipulations. Right: Reaction times and error rates per condition. Data analysis revealed a significant effect both of  $\pm IA$  and of  $\pm S$ , with no interaction between the two conditions.

## 3 Results

### 3.1 Behavioral data

#### 3.1.1 Response accuracy

There was a significant main effect of  $\pm IA$  with participants making more errors when stimuli had been presented -IA than when they had been presented +IA ( $\beta = 1.58$ ,  $SE = 0.63$ ,  $t = 2.51$ ,  $p < 0.05$ ). The semantic condition was revealed a marginal predictor of error rate, with more errors when sentences were semantically congruent, than when they were semantically incongruent ( $\beta = 1.73$ ,  $SE = 0.94$ ,  $t = 1.85$ ,  $p = 0.06$ ). Interestingly, the error rates reported here are similar to those reported in Magne et al. (2007), with most errors on sentences that were semantically congruent, but metrically unexpected (note that the metrical manipulation actually created an *illegal* pattern in Magne et al. 2007). Presence of IA and semantic congruency did not interact ( $\beta = -0.3$ ,  $SE = 1.26$ ,  $t = -0.24$ ,  $p = 0.81$ , *ns*).

#### 3.1.2 Reaction times

As can be seen in figure 2, both IA and semantic congruity affected response latencies. When stimuli had been presented -IA, participants were slower to respond than when they had been presented +IA ( $\beta = 21.0$ ,  $SE = 9.37$ ,  $t = 2.24$ ,  $p < 0.05$ ). Furthermore, as mentioned above, semantic congruity also affected reaction times ( $\beta = -78.46$ ,  $SE = 16.81$ ,  $t = -4.67$ ,  $p < 0.001$ ); congruent sentences were responded to faster than incongruent sentences. This effect was expected and is in line with the results reported in Magne et al. 2007. Presence of IA and semantic congruency did not interact ( $\beta = 10.66$ ,  $SE = 18.04$ ,  $t = 0.59$ ,  $p = 0.55$ , *ns*).

## 3.2 EEG

### 3.2.1 P2

As expected, neither  $\pm IA$  nor  $\pm S$  modulated the P2 amplitude ( $p = 0.42$  and  $p = 0.59$ , *ns* respectively). This means that differences we find on the later metrical N400 and semantic N400 cannot be attributed to differences on the early P2, held to reflect more bottom-up processing of purely acoustic information (Hillyard & Picton, 1987).

### 305 3.2.2 Early time-window: 351 – 451

306 The data reveal a main effect of  $\pm IA$ , i.e.  $\pm IA$  words modulated the metrical N400 regardless of semantic  
307 congruency (critical  $F$ -score:  $\pm 15.32$ ,  $df = 17$ ,  $p < 0.05$ ). Words  $-IA$  elicited a larger N400 than did words  
308  $+IA$  375 ms post target word onset in the antero-frontal region (Afz) (see figure 3a).

309 Semantic congruency had no effect on the metrical N400 ( $p = 0.14$ ,  $ns$ ) nor did it interact with presence  
310 of IA ( $p = 0.15$ ,  $ns$ ).

### 311 3.2.3 Late time-window: 450 – 600

312 In this later time-window, the ERP data show a main effect of semantic congruity (critical  $F$ -score:  $\pm 17.47$ ,  
313  $df = 17$ ,  $p < 0.05$ ): semantically incongruent sentences elicited a larger N400 between 492–593 ms after the  
314 onset of the target word than semantically congruent sentences in the left centro-parietal region (CP1) and the  
315 right fronto-central region (FC2) (see figure 3d). This difference in N400 amplitude was also significant within  
316 the condition  $-IA$  (critical  $F$ -score:  $\pm 17.05$ ,  $df = 17$ ,  $p < 0.05$ ) and not significant within the condition  $+IA$   
317 ( $p = 0.086$ ).

318 The main effect of IA was not significant ( $p = 0.28$ ,  $ns$ ), however, we did observe an interaction between  
319  $\pm IA$  and  $\pm S$ . The interaction effect between our two manipulations was significant between 523–593 located  
320 at centro-parietal and frontal electrodes (critical  $F$ -score:  $\pm 15.86$ ,  $df = 17$ ,  $p < 0.05$ , at Af4, Afz, CP1 and  
321 FC2), such that, in this later time-window,  $\pm IA$  had continued to modulate N400 amplitude, but only in the  
322 sentences that were semantically incongruent ((critical  $F$ -score:  $\pm 17.09$ ,  $df = 17$ ,  $p < 0.05$ , see figure 3a).

323 Furthermore, visual inspection suggested a difference in N400 onset latency between semantically con-  
324 gruent and incongruent sentences, but only in the  $-IA$  condition, indicating that conflict resolution starts  
325 later for incongruent words without initial accent. Because this visual effect is important for the discussion of  
326 the additional semantic processing cost when words are presented  $-IA$ , we computed a regression analysis  
327 with, as dependent variable, peak amplitude latency,  $\pm IA$ , semantic congruency and electrode cite (parietal,  
328 centro-parietal and central) as fixed effects, and participants as random effects. However, the analysis was not  
329 significant at  $p = 0.11$ . These results are further interpreted below.

## 330 4 Discussion

331 In the present study, we examined the phonological status of the French initial accent and its role in semantic  
332 processing. We were particularly interested in modulations of the N400 ERP component, a component typically  
333 observed subsequent to violations of lexico-semantic expectations (e.g. Kutas & Hillyard, 1980; Brown &  
334 Hagoort, 1993). Below, we present each of our findings in turn, starting with the main effect of  $\pm IA$  on  
335 the fronto-central metrical N400 to then discuss the interaction between metrical expectancy and semantic  
336 congruence on the centro-parietal N400. Finally, we will examine our behavioral data which suggest that  
337 violated metrical anticipations slow down semantic conflict resolution during speech processing.

### 338 4.1 Metrical N400

339 During the early N400 time-window, presence of initial accent modulated N400 amplitude in the antero-  
340 frontal brain area, irrespective of semantic congruency, i.e. words without initial accent elicited a larger N400  
341 than did words with initial accent (figure 3a). This, again, indicates that listeners expected words to be  
342 presented with initial accent, in line with the results reported in te Rietmolen et al. (2016). Furthermore,  
343 because our manipulation of IA did not modulate the acoustic P2, the metrical effect can be interpreted to  
344 reflect a more controlled process in the phonological processing of the initial accent, i.e. IA is phonologically

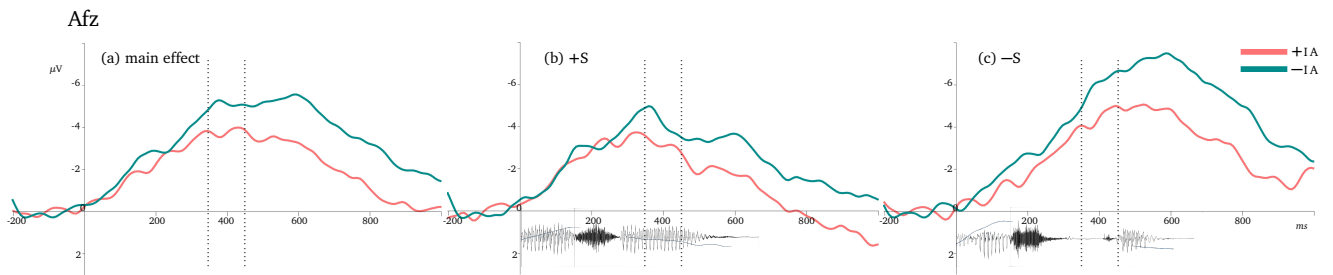

**(a)** Grand average frontal N400 in the  $\pm$ IA condition ( $-$ IA in green,  $+$ IA in pink), recorded at the Afz (anterio-frontal) electrode for: (a) main effect, (b) congruent sentences, (c) incongruent sentences. The tested time-window is indicated by dashed vertical lines. Furthermore to indicate the timing of the amplitude modulation with respect to the speech signal, the oscillograms and  $f_0$  deflections of [løsemi] (*leucémie*, +s) and [dāsité] (*densité*, -s) are plotted in the background. Negativity is plotted upwards and, for ease of presentation only, ERP waveforms are lowpass filtered at 10 Hz.

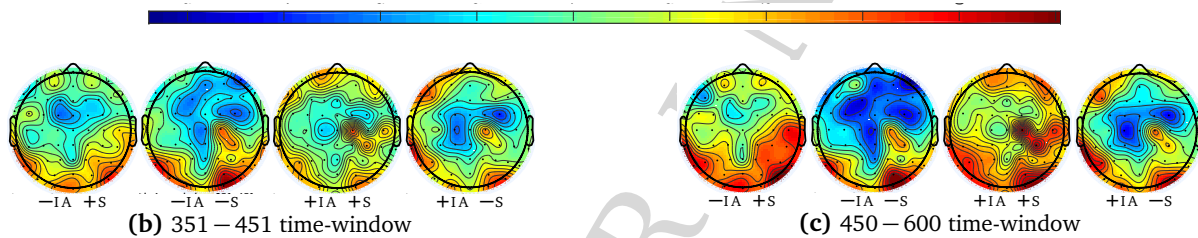

**(b)** 351 – 451 time-window

**(c)** 450 – 600 time-window

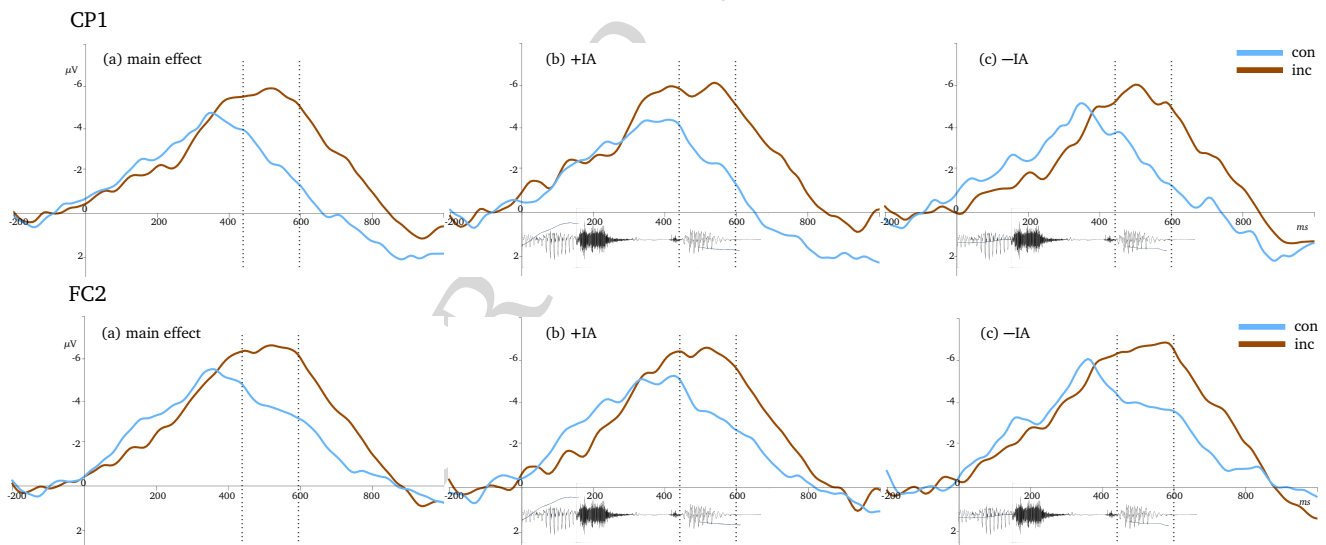

**(d)** Grand average centro-parietal N400 in the  $\pm$ s condition ( $-$ s in brown,  $+$ s in blue), recorded at the CP1 (centro-parietal, top) and FC2 (fronto-central, bottom) electrodes for: (a) main effect, (b)  $+$ IA, (c)  $-$ IA. The tested time-window is indicated by dashed vertical lines. To indicate the timing of the amplitude modulation with respect to the speech signal, the oscillograms and  $f_0$  deflections of [dāsité]  $+$ IA and  $-$ IA are plotted in the background. Negativity is plotted upwards and, for ease of presentation only, ERP waveforms are low-pass filtered at 10 Hz.

**Figure 3:** Overview of ERP data with in figure 3a the frontal N400 in the  $\pm$ IA condition recorded at the Afz, in figures 3b and 3c the topographic mean amplitude maps for the early (351 – 451) and late (450 – 600) time-windows, respectively, and in figure 3d the centro-parietal N400 in the  $\pm$ s condition recorded at the CP1.

345 natural.

346 Note also that, because in this time-window, we observed a main effect of our  $\pm$ IA manipulation, this  
347 negativity may well be another instance of the N325 and indicate difficulties in stress extraction during lexical  
348 access (cf. Böcker et al., 1999).<sup>2</sup> This finding has two important consequences for interpreting the role of IA  
349 and more generally the domain of accentuation in French. First, replicating the results reported in te Rietmolen  
350 et al. (2016) is far from trivial for a language allegedly without accent wherein stress is not lexically distinctive  
351 and has been mostly ignored by the scientific community. Replication is at the core of science, and particularly  
352 the functional value of IA—the traditionally secondary and optional accent—has been largely overlooked.  
353 Moreover, while there has been more scientific interest for the contributions of stress in speech comprehension  
354 in stress based languages, metrical stress extraction during speech processing as reflected by a modulation of  
355 the N325 had only been shown in Böcker et al. (1999), and predominantly when listeners were performing a  
356 stress discrimination task requiring them to *explicitly attend* the metrical information. Replicating the N325  
357 effect in the current work, even when using a different paradigm, shows that French listeners have a metrical  
358 expectation for the initial accent, which they extract automatically during speech processing and use in the  
359 task at hand, i.e. lexical retrieval and semantic access.

360 The second conclusion we can draw in observing a main effect of IA in the current study, is that stress  
361 extraction is hindered when words are presented without their expected initial accent marking their onset, *even*  
362 when the word is *embedded* within a sentence (i.e. not presented in isolation). Indeed, as was explained above,  
363 the previous ERP studies had always manipulated IA on isolated words where the accent was in utterance  
364 initial position, which made it difficult to rule out advantages applying to the levels higher in the prosodic  
365 hierarchy. Here, however, we obtain the same effects despite IA not being utterance initial, underscoring the  
366 phonological status of IA as marker of the left boundary of the word (cf. Astésano et al., 2007, 2012; Garnier  
367 et al., 2016; Garnier, 2018).

## 368 4.2 Semantic N400

369 During the later N400 time-window, semantic congruity modulated the N400 in the centro-parietal regions,  
370 with semantically incongruent sentences eliciting a more ample N400 than did semantically congruent sen-  
371 tences (figure 3d). This effect was however more pronounced when words were presented without IA than  
372 when they had been presented with IA, suggesting an interaction effect between semantic congruity and met-  
373 rical expectation, such that pre-semantic processes (in this case the extraction of the initial accent) facilitated  
374 subsequent semantic evaluation. Indeed, arguably, the processes of word recognition and semantic retrieval  
375 unfold, due to the temporal nature of speech input, in a cascading manner. Phonological analysis would then  
376 be required before semantic evaluation and this analysis is likely facilitated when the input meets phonological  
377 and metrical expectations (see also e.g. Rothermich et al., 2010, 2012).

378 Note that the findings therefore indicate that speech comprehension is impaired when the analysis of unex-  
379 pected metrical stress templates has a downstream impact on semantic retrieval and integration (e.g. Praamstra  
380 & Stegeman, 1993; Dumay et al., 2001; DeLong et al., 2005; Robson et al., 2017). The results then contradict  
381 the hypothesis that the N400 can only be modulated by hindered post-lexical processes such as contextual  
382 integration (van den Brink et al., 2001; Brown & Hagoort, 1993), and, instead suggest phonological processes

---

<sup>2</sup> Note that the negativity could also be an instance of the previously reported frontal N400 (Dittinger et al., 2017; François et al., 2017) in which case it would reflect novel word-form to meaning mapping. However, even if, in this study, listeners were expected to prefer words to be marked with IA, words without IA are not illegal in French, i.e. in continuous speech IA is not always fully realized and may be suppressed to serve for instance a more rhythmically balancing function. So, French listeners are expected to be quite familiar with the stress templates  $-$ IA as well. Moreover, stress is never lexically distinctive in French (word meaning never changes depending on the location of the stress) so we consider it unlikely for French listeners to perceive the  $-$ IA stress templates as “new” auditory word forms, which they would be tasked to attach to established semantic representations.

383 also affect N400 amplitudes. In this view, the N400 thus reflects the degree of lexical pre-activation with  
384 higher levels of pre-activation facilitating lexico-semantic processes and reducing N400 amplitude (Kutas &  
385 Hillyard, 1980; Kutas & Federmeier, 2011; DeLong et al., 2005; Gilbert, 2014).

386 Such a view takes the N400 to reflect predictive, anticipatory processes that need not exclusively be of  
387 semantic nature, but can be phonological as well (Praamstra & Stegeman, 1993; Dumay et al., 2001; DeLong  
388 et al., 2005; Lau et al., 2008; Robson et al., 2017). That is, our results suggest that semantic as well as  
389 phonological predictions are generated prior to bottom-up information becoming available. Frontal regions are  
390 suggested to be involved in the generation of expected information that drive top-down modulations of sensory  
391 processing (Desimone & Duncan, 1995) and may replace missing speech information (Shahin et al., 2009;  
392 Boulenger et al., 2011). Such a ‘phonological illusion’ may account for the findings reported in Jankowski et al.  
393 (1999) where the initial accent was perceived, even when its phonetic correlates were suppressed, and may  
394 account for the ERP modulations observed in the current study. In fact, because the acoustic manipulations  
395 in Jankowski and colleagues were different than the manipulations here (i.e. they had mainly manipulated  
396 the onset duration, with  $f_0$ —the modulated phonetic parameter in the current study—neutralized), the com-  
397 bined results further point to the metrical weight and phonetically-independent identity of the initial accent,  
398 although future (perception) studies are needed to better understand the neural mechanisms underlying the  
399 superposition of metrical stress.

400 Moreover, we observed an interaction effect between semantic congruity and the presence of the initial  
401 accent, such that  $\pm IA$  continued to modulate N400 amplitudes, but only when sentences were semantically  
402 incongruent (see figure 3a). This suggests that when a word did not make sense in the semantic context of  
403 the sentences, listeners re-evaluated the phonological make-up of the word. So, our results support the idea  
404 that listeners have a phonological preference for words to be marked with the initial accent in their underlying  
405 stress pattern.

### 406 4.3 Delayed semantic resolution

407 Visual inspection of the ERP waveforms further suggested a delay in N400 latency (although this latency  
408 difference was not significant) when semantically incongruent words had been presented without initial accent,  
409 indicating that, when words are presented without initial accent and thus mismatch the listener’s metrical  
410 anticipation, semantic conflict resolution starts later. Our behavioral results are in line with this interpretation.  
411 The results in response latencies showed a main effect of IA, such that when words were presented without  
412 initial accent, participants were slower to respond than when they had been presented with initial accent.  
413 This, indeed, suggests that semantic ambiguities were resolved after participants had attended to the metrical  
414 hindrance when words were presented without their expected stress template.

415 We also obtained a main effect of  $\pm IA$  on error rates, such that listeners made more errors when words  
416 had been presented without initial accent than when they had been presented with IA. Furthermore, listeners  
417 appeared to make most errors on sentences that were semantically congruent, but metrically unexpected,  
418 indicating that presenting the words without the initial accent misdirected the participants on the word’s identity.  
419 This is in line with the results reported in Magne et al. (2007), wherein metrical *congruity* was manipulated  
420 (i.e. the authors lengthened the medial syllable, a violation in French), while here we manipulated metrical  
421 *probability* (i.e. the presence of the initial accent). Whereas we predicted listeners to prefer words to be  
422 presented with initial accent, reducing its phonetic correlates did not create an illegal stress pattern. Still  
423 finding an effect of  $\pm IA$  thus shows a *strong* expectation for the, allegedly, secondary and *optional* French  
424 accent.

425 Together with our ERP results on the semantic N400, the findings suggest a strong memory trace for the  
426 initial accent, such that lexical candidates matching the memory trace are easier to recognize, responded to  
427 faster and generate smaller N400s than when candidates are less easy to match (i.e. hold a less established

428 memory trace). In other words, if listeners continuously predict upcoming speech input, they may have prepared  
429 for expected upcoming words by activating their expected phonological, metrical and semantic features from  
430 the mental lexicon (e.g. Lau et al., 2008). When all these features mismatched, reaction times were slowed  
431 down, and ERP amplitudes and latencies, which index prediction errors, increased.

## 432 **5 In conclusion**

433 In sum, we investigated the status of the French initial accent and its function in lexico-semantic processing.  
434 The initial accent was previously thought of as an optional and secondary accent in French, sub-serving the  
435 primary final accent in the marking of phrase boundaries. Previous ERP studies which also investigated the  
436 phonological status of IA (e.g. Astésano et al., 2013; Aguilera et al., 2014; te Rietmolen et al., 2016) showed  
437 a phonological expectancy for IA and a disruption in pre-lexical stress processing when IA had been omitted.  
438 However, in the studies, words were presented in isolation, with IA in utterance initial position. Therefore, it  
439 had remained unclear whether the facilitatory effects of IA really applied to the lexical domain. In the current  
440 study, the initial accent was not utterance initial but embedded in a sentence. We found the presence of IA to  
441 modulate the N400 not only in the fronto-central brain regions, but also in the centro-parietal regions. That is,  
442 when asking listeners to judge the semantic congruity of sentences that differed only in the explicit presence  
443 of the initial accent, lexico-semantic processing (as reflected by the N400) was still affected. Pre-lexical stress  
444 templates serve to access the mental lexicon. Our data demonstrate that presenting words without IA obstructs  
445 lexical access, which in turn, cascades up the process of speech comprehension to additionally hinder post-  
446 lexical processing. In other words, French speech processing naturally and automatically engages metrical  
447 stress processing.

## 448 **Acknowledgments**

449 This study was supported by the Agence Nationale de la Recherche grant ANR-12-BSH2-0001 (PI: Corine  
450 Astésano).

## 451 **References**

- 452 Aguilera, M., El Yagoubi, R., Espesser, R., & Astésano, C. 2014. Event-Related Potential investigation of Initial  
453 Accent processing in French. *Speech Prosody 2014*, 383–387.
- 454 Astésano, C. 2001. *Rythme et accentuation en français: invariance et variabilité stylistique*. L'Harmattan.
- 455 Astésano, C. 2016. Prosodic Characteristics of Reference French. *Varieties of Spoken French*, ed. by Sylvain  
456 Detey, Jacques Durand, and Bernard Lyche Chantal, Laks.
- 457 Astésano, C., Bard, E. G., & Turk, A. 2007. Structural influences on initial accent placement in French. *Lang.*  
458 *Speech* 50.423–446.
- 459 Astésano, C. & Bertrand, R. 2016. Accentuation et niveaux de constituance en français : enjeux phonologiques  
460 et psycholinguistiques. *Langue française* NÂ° 191.11–30.
- 461 Astésano, C., Bertrand, R., Espesser, R., & Nguyen, N. 2012. Perception des frontières et des proéminences en  
462 français. *Actes de la conférence conjointe JEP-TALN-RECITAL*, 353–360.
- 463 Astésano, C., El Yagoubi, R., & Aguilera, M. 2013. Processing of the Initial Accent by French listeners:  
464 investigation of pre-attentional and attentional processing in an oddball paradigm. *AMLaP : Architecture*  
465 *and Mechanisms of Language Processing*.
- 466 Astésano, C., Magne, C., El Yagoubi, R., & Besson, M. 2004. Influence du rythme sur le traitement sémantique  
467 en français: approches comportementale et électrophysiologique. *JEP 2004, Fes, Maroc*.
- 468 Bagou, O., Fougeron, C., & Frauenfelder, U. H. 2002. Contribution of prosody to the segmentation and storage  
469 of words in the acquisition of a new mini-language. *Speech Prosody 2002, International Conference*.
- 470 Banel, M.-H. & Bacri, N. 1994. On metrical patterns and lexical parsing in French. *Speech Commun.* 15.115–  
471 126.
- 472 Bates, D., Maechler, M., & Bolker, B. 2012. lme4: linear mixed-effects models using S4 classes. R package  
473 version.
- 474 Blair, R. C. & Karniski, W. 1993. An alternative method for significance testing of waveform difference  
475 potentials. *Psychophysiology* 30.518–524.
- 476 Böcker, K. B., Bastiaansen, M. C., Vroomen, J., Brunia, C. H., & de Gelder, B. 1999. An ERP correlate of metrical  
477 stress in spoken word recognition. *Psychophysiology* 36.706–720.
- 478 Boersma, P. & Weenink, D. 2016. Praat software. University of Amsterdam.
- 479 Bohn, K., Knaus, J., Wiese, R., & Domahs, U. 2013. The influence of rhythmic (ir)regularities on speech  
480 processing: Evidence from an ERP study on German phrases. *Neuropsychologia* 51.760–771.
- 481 Boulenger, V., Hoen, M., Jacquier, C., & Meunier, F. 2011. Interplay between acoustic/phonetic and semantic  
482 processes during spoken sentence comprehension: an ERP study. *Brain Lang.* 116.51–63.
- 483 van den Brink, D., Brown, C. M., & Hagoort, P. 2001. Electrophysiological evidence for early contextual  
484 influences during spoken-word recognition: N200 versus N400 effects. *J. Cogn. Neurosci.* 13.967–985.
- 485 Brown, C. & Hagoort, P. 1993. The processing nature of the n400: evidence from masked priming. *J. Cogn.*  
486 *Neurosci.* 5.34–44.

- 487 Christophe, A., Peperkamp, S., Pallier, C., Block, E., & Mehler, J. 2004. Phonological phrase boundaries  
488 constrain lexical access I. Adult data. *J. Mem. Lang.* 51.523–547.
- 489 Cunillera, T., Càmara, E., Toro, J. M., Marco-Pallares, J., Sebastián-Galles, N., Ortiz, H., Pujol, J., & Rodríguez-  
490 Fornells, A. 2009. Time course and functional neuroanatomy of speech segmentation in adults. *Neuroimage*  
491 48.541–553.
- 492 Cutler, A. & Norris, D. 1988. The role of strong syllables in segmentation for lexical access. *J. Exp. Psychol.*  
493 *Hum. Percept. Perform.*
- 494 Cutler, A. 1990. *Exploiting prosodic probabilities in speech segmentation*. The MIT Press.
- 495 Delattre, P. 1966. A comparison of syllable length conditioning among languages. *IRAL Int. Rev. Appl. Linguist.*  
496 *Lang. Teach.*
- 497 DeLong, K. A., Urbach, T. P., & Kutas, M. 2005. Probabilistic word pre-activation during language comprehen-  
498 sion inferred from electrical brain activity. *Nat. Neurosci.* 8.1117–1121.
- 499 Delorme, A. & Makeig, S. 2004. EEGLAB: an open source toolbox for analysis of single-trial EEG dynamics  
500 including independent component analysis. *J. Neurosci. Methods* 134.9–21.
- 501 Desimone, R. & Duncan, J. 1995. Neural mechanisms of selective visual attention. *Annu. Rev. Neurosci.*  
502 18.193–222.
- 503 Di Cristo, A. 1999. Vers une modélisation de l'accentuation du français: première partie. *Journal of French*  
504 *language studies* 9.143–179.
- 505 Di Cristo, A. 2000. Vers une modélisation de l'accentuation du français (seconde partie). *Journal of French*  
506 *language studies* 10.27–44.
- 507 Dittinger, E., Chobert, J., Ziegler, J. C., & Besson, M. 2017. Fast Brain Plasticity during Word Learning in  
508 Musically-Trained Children. *Front. Hum. Neurosci.* 11.233.
- 509 Dumay, N., Benraïss, A., Barriol, B., Colin, C., Radeau, M., & Besson, M. 2001. Behavioral and electrophysio-  
510 logical study of phonological priming between bisyllabic spoken words. *J. Cogn. Neurosci.* 13.121–143.
- 511 Dumay, N., Frauenfelder, U. H., & Content, A. 2002. The role of the syllable in lexical segmentation in French:  
512 word-spotting data. *Brain Lang.* 81.144–161.
- 513 Fields, E. C. 2017. Factorial Mass Univariate ERP Toolbox [Computer Software].
- 514 Fónagy, I. 1980. L'accent en français: accent probabilitaire. *L'accent en français contemporain (Studia*  
515 *Phonetica)*, ed. by I Fónagy and P Leon, vol. 15, 123–233.
- 516 François, C., Cunillera, T., Garcia, E., Laine, M., & Rodriguez-Fornells, A. 2017. Neurophysiological evidence  
517 for the interplay of speech segmentation and word-referent mapping during novel word learning. *Neuropsychologia*  
518 98.56–67.
- 519 Garnier, L. 2018. *Quels liens entre accentuation et niveaux de constitution en français? Une analyse perceptive et*  
520 *acoustique*. UT2J, Toulouse dissertation.
- 521 Garnier, L., Baqué, L., Dagnac, A., & Astésano, C. 2016. Perceptual investigation of prosodic phrasing in French.  
522 *Speech Prosody 2016*.



- 523 Gilbert, R. 2014. *Temporal properties of rehearsal in auditory-verbal short-term memory*. University of York  
524 dissertation.
- 525 Groppe, D. M., Urbach, T. P., & Kutas, M. 2011. Mass univariate analysis of event-related brain potentials/fields  
526 I: a critical tutorial review. *Psychophysiology* 48.1711–1725.
- 527 Hillyard, S. A. & Picton, T. W. 1987. Electrophysiology of cognition. *Handbook of physiology* 5.519–584.
- 528 Jankowski, L., Astésano, C., & Di Cristo, A. 1999. The initial rhythmic accent in French: Acoustic data and  
529 perceptual investigation. *Proceedings of the 14th International Congress of Phonetic Sciences*, vol. 1, 257–260.
- 530 Jun, S.-A. & Fougeron, C. 2000. A Phonological Model of French Intonation. *Intonation: Analysis, Modelling  
531 and Technology*, ed. by Antonis Botinis, Text, Speech and Language Technology, 209–242. Dordrecht: Springer  
532 Netherlands.
- 533 Kuperberg, G. R. & Jaeger, T. F. 2016. What do we mean by prediction in language comprehension? *Language,  
534 cognition and neuroscience*.
- 535 Kutas, M. & Hillyard, S. A. 1980. Reading senseless sentences: brain potentials reflect semantic incongruity.  
536 *Science* 207.203–205.
- 537 Kutas, M. & Federmeier, K. D. 2011. Thirty years and counting: finding meaning in the N400 component of  
538 the event-related brain potential (ERP). *Annu. Rev. Psychol.* 62.621–647.
- 539 Ladd, D. R. 2008. *Intonational Phonology*. Cambridge University Press.
- 540 Lau, E. F., Phillips, C., & Poeppel, D. 2008. A cortical network for semantics: (de)constructing the N400. *Nat.  
541 Rev. Neurosci.* 9.920–933.
- 542 Liberman, M. & Prince, A. 1977. On Stress and Linguistic Rhythm. *Linguist. Inq.* 8.249–336.
- 543 Luck, S., Huang, S., & Lopez-Calderon, J. 2010. *Erplab toolbox*.
- 544 Luck, S. 2014. The Mass Univariate Approach and Permutation Statistics. *ERP analysis*.
- 545 Magne, C., Astésano, C., Aramaki, M., Ystad, S., Kronland-Martinet, R., & Besson, M. 2007. Influence of  
546 syllabic lengthening on semantic processing in spoken French: behavioral and electrophysiological evidence.  
547 *Cereb. Cortex* 17.2659–2668.
- 548 Marie, C., Magne, C., & Besson, M. 2011. Musicians and the metric structure of words. *J. Cogn. Neurosci.*  
549 23.294–305.
- 550 Mathworks, I. 2014. MATLAB: R2014a.
- 551 Nespore, M. & Vogel, I. 1983. Prosodic Structure Above the Word. *Prosody: Models and Measurements*,  
552 ed. by Anne Cutler and D Robert Ladd, Springer Series in Language and Communication, 123–140. Berlin,  
553 Heidelberg: Springer Berlin Heidelberg.
- 554 New, B., Pallier, C., Ferrand, L., & Matos, R. 2001. Une base de données lexicales du français contemporain sur  
555 internet: LEXIQUE//A lexical database for contemporary french: LEXIQUE. *L'année psychologique* 101.447–  
556 462.

- 557 Nieuwland, M. S., Barr, D. J., Bartolozzi, F., Busch-Moreno, S., Darley, E., Donaldson, D. I., Ferguson, H. J., Fu,  
558 X., Heyselaar, E., Huettig, F., Matthew Husband, E., Ito, A., Kazanina, N., Kogan, V., Kohut, Z., Kulakova, E.,  
559 Meziere, D., Politzer-Ahles, S., Rousselet, G., Rueschemeyer, S.-A., Segaert, K., Tuomainen, J., & Von Grebmer  
560 Zu Wolfsthurn, S. 2018. Dissociable effects of prediction and integration during language comprehension:  
561 Evidence from a large-scale study using brain potentials.
- 562 Pitt, M. A. & Samuel, A. G. 1990. The use of rhythm in attending to speech. *J. Exp. Psychol. Hum. Percept.*  
563 *Perform.* 16.564–573.
- 564 Praamstra, P. & Stegeman, D. F. 1993. Phonological effects on the auditory N400 event-related brain potential.  
565 *Brain Res. Cogn. Brain Res.* 1.73–86.
- 566 te Rietmolen, N., El Yagoubi, R., Espesser, R., Magnen, C., & Astesano, C. 2016. Investigating the phonological  
567 status of the Initial Accent in French: an Event-Related Potentials study. *Speech Prosody 2016*.
- 568 Robson, H., Pilkington, E., Evans, L., DeLuca, V., & Keidel, J. L. 2017. Phonological and semantic process-  
569 ing during comprehension in Wernicke’s aphasia: An N400 and Phonological Mapping Negativity Study.  
570 *Neuropsychologia* 100.144–154.
- 571 Rolland, G. & Løevenbruck, H. 2002. Characteristics of the accentual phrase in French: An acoustic, articulatory  
572 and perceptual study. *Speech Prosody 2002, International Conference*. [isca-speech.org](http://isca-speech.org).
- 573 Rossi, M. 1980. Le français, langue sans accent? *L’accent en français contemporain (Studia Phonetica)*, ed. by  
574 I Fonagy and P Leon, vol. 15, 13–51.
- 575 Rothermich, K. & Kotz, S. A. 2013. Predictions in speech comprehension: fMRI evidence on the meter-semantic  
576 interface. *Neuroimage* 70.89–100.
- 577 Rothermich, K., Schmidt-Kassow, M., & Kotz, S. A. 2012. Rhythm’s gonna get you: regular meter facilitates  
578 semantic sentence processing. *Neuropsychologia* 50.232–244.
- 579 Rothermich, K., Schmidt-Kassow, M., Schwartz, M., & Kotz, S. A. 2010. Event-related potential responses to  
580 metric violations: rules versus meaning. *Neuroreport* 21.580–584.
- 581 Shahin, A. J., Bishop, C. W., & Miller, L. M. 2009. Neural mechanisms for illusory filling-in of degraded speech.  
582 *Neuroimage* 44.1133–1143.
- 583 Spinelli, E., Grimault, N., Meunier, F., & Welby, P. 2010. An intonational cue to word segmentation in  
584 phonemically identical sequences. *Atten. Percept. Psychophys.* 72.775–787.
- 585 Steinhauer, K. & Connolly, J. F. 2008. Event-Related Potentials in the Study of Language. *Concise Encyclopedia*  
586 *of Brain and Language*. Elsevier.
- 587 Team, R. C. 2014. The R project for statistical computing.
- 588 Vaissière, J. 1991. Rhythm, accentuation and final lengthening in French. *Music, Language, Speech and Brain:*  
589 *Proceedings of an International Symposium at the Wenner-Gren Center, Stockholm, 5–8 September 1990*, ed. by  
590 Johan Sundberg, Lennart Nord, and Rolf Carlson, Wenner-Gren Center International Symposium Series,  
591 108–120. London: Macmillan Education UK.
- 592 Wauquier-Gravelines, S. 1999. Segmentation lexicale de la parole continue : la linéarité en question. *Recherches*  
593 *linguistiques de Vincennes* n° 28.8–8.

594 Welby, P. 2007. The role of early fundamental frequency rises and elbows in French word segmentation. *Speech*  
595 *Commun.* 49.28–48.

596 Yan, S., Kuperberg, G. R., & Jaeger, T. F. 2017. Prediction (Or Not) During Language Processing. A Commentary  
597 On Nieuwland et al.(2017) And DeLong et al.(2005). *bioRxiv*.

PREPRINT
